# Supplementary material
Source: MDPI journal article supplement (https://www.mdpi.com/2673-7108/2/3/12)
Supplement: s1 [file constrmater-1795455-supplementary.pdf › constrmater-1795455-supplementary.pdf]

# Anticorrosion performance of magnesium hydroxide coatings on steel substrates

Domna Merachtsaki, Ilias Toliopoulos, Efrosini Peleka and Anastasios Zouboulis\*

Division of Chemical and Environmental Technology, Department of Chemistry,  
Aristotle University of Thessaloniki, 54124 Thessaloniki, Greece

\* Correspondence: zoubouli@chem.auth.gr

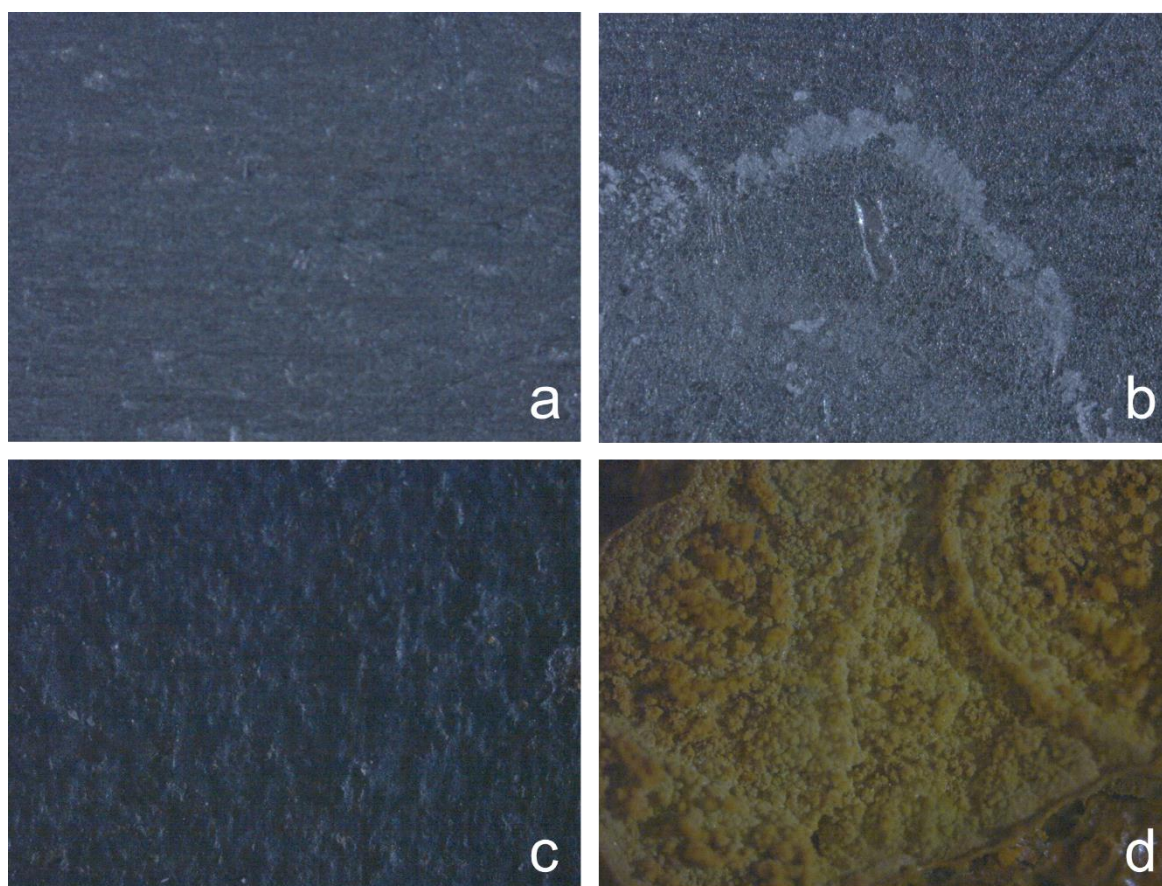

**Figure S1.** Surface observations, by using an optical microscope, of uncoated stainless steel specimens: (a) before, and (b) after 4 days of sulfuric acid spraying test, and of uncoated mild steel specimens: (c) before, and (d) after 4 days of acid spraying test.

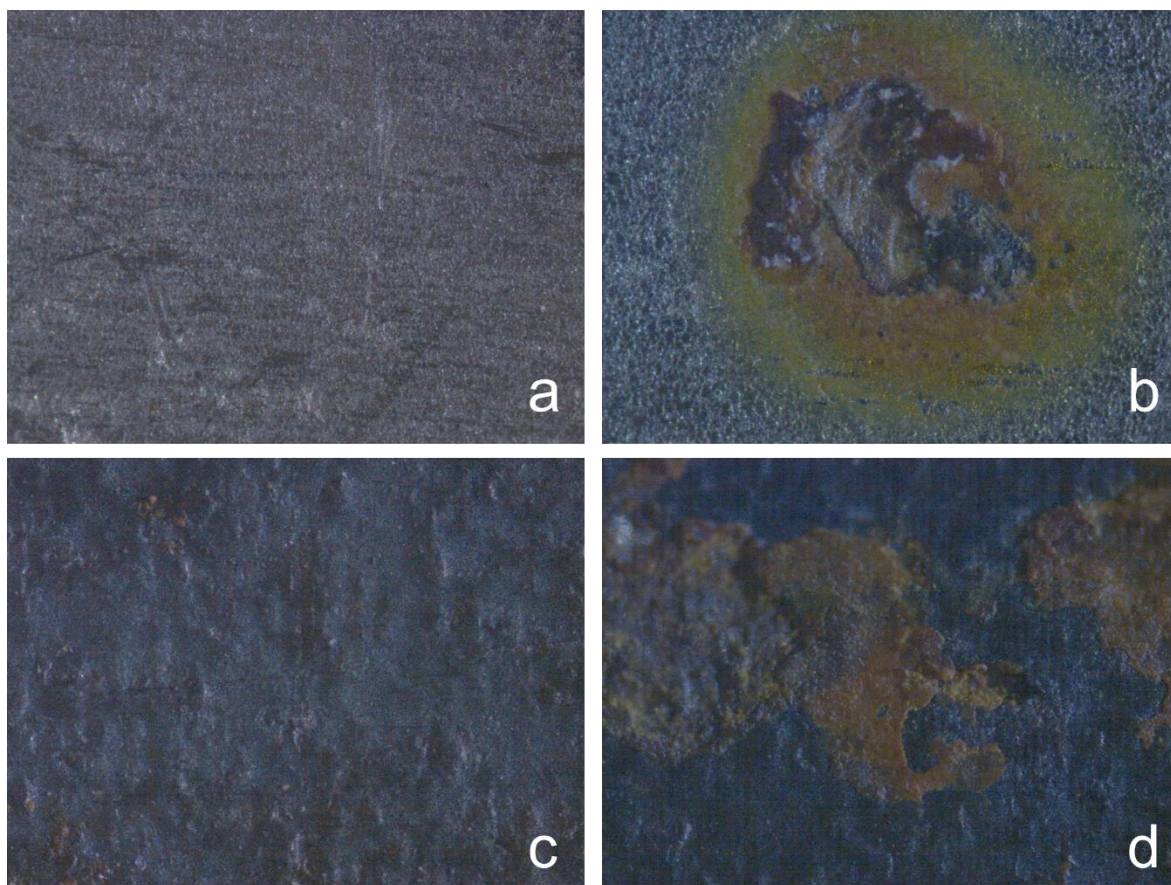

**Figure S2.** Surface observations, by using an optical microscope, of the stainless steel specimens coated with: (a) C6, and (b) C2 coatings, and of the mild steel specimens coated with: (c) C6, and (d) C2 coatings; after 4 days of sulfuric acid spraying test and after removing the coatings for all the specimens.

**Table S1** Parameter values of the equivalent circuit that result from the fitting of the experimental data of the uncoated stainless-steel specimens.

| Uncoated                                     |          |          |          |          |
|----------------------------------------------|----------|----------|----------|----------|
| Spraying days \ Parameter                    | 1        | 2        | 3        | 4        |
| $R_s$ ( $\Omega \text{ cm}^2$ )              | 17.05    | 15.12    | 26.26    | 36.92    |
| $Q_f$ ( $S \text{ cm}^{-2} \text{ s}^n$ )    | 5.26E-05 | 6.90E-05 | 6.50E-05 | 1.15E-04 |
| $n$                                          | 0.92     | 0.87     | 0.87     | 1.00     |
| $R_f$ ( $\Omega \text{ cm}^2$ )              | 7.80E+04 | 3.57E+04 | 7.98E+07 | 1.16E+07 |
| $Q_{dl}$ ( $S \text{ cm}^{-2} \text{ s}^n$ ) | 2.27E-03 | 2.58E-04 | 6.72E-02 | 1.72E-04 |
| $n$                                          | 0.52     | 0.74     | 0.81     | 0.81     |
| $R_{ct}$ ( $\Omega \text{ cm}^2$ )           | 2.50E+04 | 1.77E+03 | 1.23E+03 | 3.57E+04 |
| Chi-squared                                  | 4.01E-05 | 3.86E-04 | 2.05E-03 | 6.85E-04 |

**Table S2** Parameter values of the equivalent circuit that result from the fitting of the experimental data of the coated stainless-steel specimens with coating C1.

| C1                                                                  |          |          |          |          |
|---------------------------------------------------------------------|----------|----------|----------|----------|
| <b>Spraying days</b><br><b>Parameter</b>                            | 1        | 2        | 3        | 4        |
| <b>Rs (<math>\Omega \text{ cm}^2</math>)</b>                        | 3.84E-02 | 3.15E+01 | 4.84E-05 | 3.40E-01 |
| <b>Q<sub>coat</sub> (<math>\text{S cm}^{-2} \text{ s}^n</math>)</b> | 1.90E-04 | 7.97E-03 | 1.34E-04 | 2.41E-03 |
| <b>n</b>                                                            | 0.06     | 0.36     | 0.00     | 0.96     |
| <b>R<sub>coat</sub> (<math>\Omega \text{ cm}^2</math>)</b>          | 3.22E+01 | 1.11E+05 | 3.95E+01 | 2.52E+03 |
| <b>Q<sub>dl</sub> (<math>\text{S cm}^{-2} \text{ sn}</math>)</b>    | 2.80E-05 | 2.63E-05 | 2.80E-05 | 2.17E-02 |
| <b>n</b>                                                            | 0.90     | 0.93     | 0.91     | 0.83     |
| <b>R<sub>ct</sub> (<math>\Omega \text{ cm}^2</math>)</b>            | 3.80E+07 | 3.20E+16 | 3.64E+08 | 4.31E-01 |
| <b>Chi-squared</b>                                                  | 1.84E-03 | 3.17E-04 | 1.40E-03 | 7.72E-04 |

**Table S3** Parameter values of the equivalent circuit that result from the fitting of the experimental data of the coated stainless-steel specimens with coating C2.

| C2                                                                  |          |          |          |          |
|---------------------------------------------------------------------|----------|----------|----------|----------|
| <b>Spraying days</b><br><b>Parameter</b>                            | 1        | 2        | 3        | 4        |
| <b>Rs (<math>\Omega \text{ cm}^2</math>)</b>                        | 31.68    | 26.86    | 33.85    | 3.05E-07 |
| <b>Q<sub>coat</sub> (<math>\text{S cm}^{-2} \text{ s}^n</math>)</b> | 1.85E-02 | 1.58E-02 | 2.30E-04 | 3.89E-03 |
| <b>n</b>                                                            | 0.2813   | 0.244    | 0.7143   | 0.916    |
| <b>R<sub>coat</sub> (<math>\Omega \text{ cm}^2</math>)</b>          | 3.02E+01 | 9.12E+13 | 1.94E+03 | 9.70E+09 |
| <b>Q<sub>dl</sub> (<math>\text{S cm}^{-2} \text{ sn}</math>)</b>    | 2.90E-05 | 2.69E-05 | 2.50E-05 | 2.05E+00 |
| <b>n</b>                                                            | 0.9072   | 0.935    | 0.9927   | 0.0261   |
| <b>R<sub>ct</sub> (<math>\Omega \text{ cm}^2</math>)</b>            | 2.00E+06 | 5.40E+15 | 1.51E+05 | 2.85E+01 |
| <b>Chi-squared</b>                                                  | 3.80E-04 | 4.02E-05 | 2.89E-04 | 7.10E-04 |

**Table S4** Parameter values of the equivalent circuit that result from the fitting of the experimental data of the coated stainless-steel specimens with coating C3.

| C3                                                                  |          |          |          |          |
|---------------------------------------------------------------------|----------|----------|----------|----------|
| <b>Spraying days</b><br><b>Parameter</b>                            | 1        | 2        | 3        | 4        |
| <b>Rs (<math>\Omega \text{ cm}^2</math>)</b>                        | 2.93E-01 | 3.15E-01 | 3.05E-07 | 3.02E-01 |
| <b>Q<sub>coat</sub> (<math>\text{S cm}^{-2} \text{ s}^n</math>)</b> | 2.88E-03 | 2.59E-03 | 2.64E-03 | 7.35E+06 |
| <b>n</b>                                                            | 0.92     | 0.90     | 0.92     | 0.45     |
| <b>R<sub>coat</sub> (<math>\Omega \text{ cm}^2</math>)</b>          | 1.02E+08 | 1.62E+09 | 9.74E+09 | 5.06E-03 |
| <b>Q<sub>dl</sub> (<math>\text{S cm}^{-2} \text{ sn}</math>)</b>    | 1.44E-01 | 9.18E+04 | 1.90E+00 | 2.93E-03 |
| <b>n</b>                                                            | 0.59     | 0.98     | 0.03     | 0.89     |
| <b>R<sub>ct</sub> (<math>\Omega \text{ cm}^2</math>)</b>            | 3.09E-01 | 3.05E-07 | 9.73E+03 | 2.86E+08 |
| <b>Chi-squared</b>                                                  | 2.00E-04 | 1.50E-03 | 1.39E-04 | 1.21E-03 |

**Table S5** Parameter values of the equivalent circuit that result from the fitting of the experimental data of the coated stainless-steel specimens with coating C4.

| C4                                                                  |          |          |          |          |
|---------------------------------------------------------------------|----------|----------|----------|----------|
| <b>Spraying days</b><br><b>Parameter</b>                            | 1        | 2        | 3        | 4        |
| <b>Rs (<math>\Omega \text{ cm}^2</math>)</b>                        | 3.05E-07 | 2.83E-04 | 3.24E-01 | 2.81E-01 |
| <b>Q<sub>coat</sub> (<math>\text{S cm}^{-2} \text{ s}^n</math>)</b> | 2.58E-03 | 2.24E+00 | 1.03E-04 | 2.96E-03 |
| <b>n</b>                                                            | 0.90     | 0.03     | 0.00     | 0.88     |
| <b>R<sub>coat</sub> (<math>\Omega \text{ cm}^2</math>)</b>          | 3.70E+09 | 1.03E+04 | 3.05E-07 | 3.14E+08 |
| <b>Q<sub>dl</sub> (<math>\text{S cm}^{-2} \text{ sn}</math>)</b>    | 2.02E+00 | 2.44E-03 | 2.91E-03 | 5.50E-03 |
| <b>n</b>                                                            | 0.03     | 0.93     | 0.90     | 0.91     |
| <b>R<sub>ct</sub> (<math>\Omega \text{ cm}^2</math>)</b>            | 2.08E+02 | 1.27E+14 | 1.60E+10 | 7.83E+01 |
| <b>Chi-squared</b>                                                  | 1.18E-04 | 1.47E-04 | 8.07E-04 | 3.22E-04 |

**Table S6** Parameter values of the equivalent circuit that result from the fitting of the experimental data of the coated stainless-steel specimens with coating C5.

| C5                                                                  |          |          |          |          |
|---------------------------------------------------------------------|----------|----------|----------|----------|
| <b>Spraying days</b><br><b>Parameter</b>                            | 1        | 2        | 3        | 4        |
| <b>Rs (<math>\Omega \text{ cm}^2</math>)</b>                        | 0.28     | 0.34     | 0.32     | 0.34     |
| <b>Q<sub>coat</sub> (<math>\text{S cm}^{-2} \text{ s}^n</math>)</b> | 1.42E-05 | 3.06E-03 | 2.93E-03 | 3.09E-03 |
| <b>n</b>                                                            | 0.00     | 0.88     | 0.89     | 0.89     |
| <b>R<sub>coat</sub> (<math>\Omega \text{ cm}^2</math>)</b>          | 1.24E-08 | 6.00E+05 | 1.37E+09 | 1.20E+05 |
| <b>Q<sub>dl</sub> (<math>\text{S cm}^{-2} \text{ sn}</math>)</b>    | 3.28E-03 | 3.23E-02 | 1.60E+02 | 7.86E-02 |
| <b>n</b>                                                            | 0.88     | 1.00     | 0.03     | 0.58     |
| <b>R<sub>ct</sub> (<math>\Omega \text{ cm}^2</math>)</b>            | 3.34E+08 | 2.85E+01 | 7.40E-14 | 1.78E-01 |
| <b>Chi-squared</b>                                                  | 2.22E-03 | 9.96E-04 | 2.94E-02 | 5.80E-05 |

**Table S7** Parameter values of the equivalent circuit that result from the fitting of the experimental data of the coated stainless-steel specimens with coating C6.

| C6                                                                  |          |          |          |          |
|---------------------------------------------------------------------|----------|----------|----------|----------|
| <b>Spraying days</b><br><b>Parameter</b>                            | 1        | 2        | 3        | 4        |
| <b>Rs (<math>\Omega \text{ cm}^2</math>)</b>                        | 20.47    | 17.22    | 25.45    | 39.09    |
| <b>Q<sub>coat</sub> (<math>\text{S cm}^{-2} \text{ s}^n</math>)</b> | 1.00E-03 | 8.04E-03 | 4.00E-03 | 3.44E-05 |
| <b>n</b>                                                            | 0.65     | 0.43     | 0.46     | 0.94     |
| <b>R<sub>coat</sub> (<math>\Omega \text{ cm}^2</math>)</b>          | 9.22E+00 | 1.44E+04 | 2.24E+01 | 4.02E+05 |
| <b>Q<sub>dl</sub> (<math>\text{S cm}^{-2} \text{ sn}</math>)</b>    | 2.46E-05 | 3.71E-05 | 2.90E-05 | 0.00025  |
| <b>n</b>                                                            | 0.92     | 0.92     | 0.94     | 0.70     |
| <b>R<sub>ct</sub> (<math>\Omega \text{ cm}^2</math>)</b>            | 1.84E+11 | 3.08E+05 | 3.78E+09 | 1.44E+10 |
| <b>Chi-squared</b>                                                  | 9.22E-05 | 4.77E-05 | 3.55E-05 | 1.96E-04 |

**Table S8** Parameter values of the equivalent circuit that result from the fitting of the experimental data of the coated stainless-steel specimens with coating C7.

| C7                                                                  |          |          |          |          |
|---------------------------------------------------------------------|----------|----------|----------|----------|
| <b>Spraying days</b><br><b>Parameter</b>                            | <b>1</b> | <b>2</b> | <b>3</b> | <b>4</b> |
| <b>Rs (<math>\Omega \text{ cm}^2</math>)</b>                        | 5.01     | 17.99    | 25.85    | 39.22    |
| <b>Q<sub>coat</sub> (<math>\text{S cm}^{-2} \text{ s}^n</math>)</b> | 2.80E-05 | 1.71E-04 | 1.07E-02 | 2.45E-05 |
| <b>n</b>                                                            | 0.91     | 1.00     | 0.31     | 0.99     |
| <b>R<sub>coat</sub> (<math>\Omega \text{ cm}^2</math>)</b>          | 1.90E+06 | 3.57E+07 | 2.90E+23 | 1.91E+05 |
| <b>Q<sub>dl</sub> (<math>\text{S cm}^{-2} \text{ sn}</math>)</b>    | 1.80E-06 | 3.55E-05 | 3.21E-05 | 0.000245 |
| <b>n</b>                                                            | 0.72     | 0.89     | 0.90     | 0.68     |
| <b>R<sub>ct</sub> (<math>\Omega \text{ cm}^2</math>)</b>            | 1.87E+01 | 5.73E+05 | 4.72E+08 | 2.25E+03 |
| <b>Chi-squared</b>                                                  | 6.36E-04 | 1.10E-03 | 8.41E-05 | 3.59E-04 |

**Table S9** Parameter values of the equivalent circuit that result from the fitting of the experimental data of the coated stainless-steel specimens with coating C8.

| C8                                                                  |          |          |          |          |
|---------------------------------------------------------------------|----------|----------|----------|----------|
| <b>Spraying days</b><br><b>Parameter</b>                            | <b>1</b> | <b>2</b> | <b>3</b> | <b>4</b> |
| <b>Rs (<math>\Omega \text{ cm}^2</math>)</b>                        | 1.80E-01 | 4.22E-01 | 6.66E-10 | 3.43E-01 |
| <b>Q<sub>coat</sub> (<math>\text{S cm}^{-2} \text{ s}^n</math>)</b> | 1.87E+00 | 4.21E-03 | 3.72E-03 | 3.27E-03 |
| <b>n</b>                                                            | 0.15     | 0.83     | 0.83     | 0.91     |
| <b>R<sub>coat</sub> (<math>\Omega \text{ cm}^2</math>)</b>          | 4.70E+05 | 8.05E+02 | 1.74E+08 | 6.36E+02 |
| <b>Q<sub>dl</sub> (<math>\text{S cm}^{-2} \text{ sn}</math>)</b>    | 0.0027   | 3.61E-07 | 9.20E-13 | 0.2457   |
| <b>n</b>                                                            | 0.90     | 1.00     | 0.00     | 0.18     |
| <b>R<sub>ct</sub> (<math>\Omega \text{ cm}^2</math>)</b>            | 2.31E+00 | 5.96E-02 | 6.19E-01 | 2.04E+03 |
| <b>Chi-squared</b>                                                  | 2.28E-04 | 6.34E-03 | 1.34E-02 | 5.68E-04 |

**Table S10** Parameter values of the equivalent circuit that result from the fitting of the experimental data of the uncoated mild steel specimens.

| Uncoated                                                         |          |          |          |          |
|------------------------------------------------------------------|----------|----------|----------|----------|
| <b>Spraying days</b><br><b>Parameter</b>                         | <b>1</b> | <b>2</b> | <b>3</b> | <b>4</b> |
| <b>Rs (<math>\Omega \text{ cm}^2</math>)</b>                     | 47.80    | 19.20    | 33.04    | 19.35    |
| <b>Q<sub>f</sub> (<math>\text{S cm}^{-2} \text{ s}^n</math>)</b> | 1.244    | 0.033    | 0.024    | 0.010    |
| <b>n</b>                                                         | 1.00     | 0.32     | 0.53     | 0.34     |
| <b>R<sub>f</sub> (<math>\Omega \text{ cm}^2</math>)</b>          | 4.84E-08 | 3291     | 5.80E+08 | 4.88E+08 |
| <b>Q<sub>dl</sub> (<math>\text{S cm}^{-2} \text{ sn}</math>)</b> | 5.79E-03 | 4.66E+01 | 4.23E-01 | 5.54E-12 |
| <b>n</b>                                                         | 0.54     | 1.00     | 0.01     | 0.22     |
| <b>R<sub>ct</sub> (<math>\Omega \text{ cm}^2</math>)</b>         | 2.14E+05 | 1.10E-03 | 4.48E-14 | 3.04E+07 |
| <b>Chi-squared</b>                                               | 3.25E-05 | 5.56E-05 | 5.98E-05 | 5.85E-03 |

**Table S11** Parameter values of the equivalent circuit that result from the fitting of the experimental data of the coated mild steel specimens with coating C1.

| C1                                                                  |          |          |          |          |
|---------------------------------------------------------------------|----------|----------|----------|----------|
| <b>Spraying days</b><br><b>Parameter</b>                            | 1        | 2        | 3        | 4        |
| <b>Rs (<math>\Omega \text{ cm}^2</math>)</b>                        | 43.99    | 57.39    | 40.86    | 39.17    |
| <b>Q<sub>coat</sub> (<math>\text{S cm}^{-2} \text{ s}^n</math>)</b> | 7.35E-05 | 0.001    | 3.03E-07 | 0.002    |
| <b>n</b>                                                            | 0.82     | 0.00     | 0.79     | 0.62     |
| <b>R<sub>coat</sub> (<math>\Omega \text{ cm}^2</math>)</b>          | 0.012    | 0.035    | 0.114    | 3.58E-16 |
| <b>Q<sub>dl</sub> (<math>\text{S cm}^{-2} \text{ sn}</math>)</b>    | 1.71E-03 | 2.90E-03 | 1.20E-03 | 4.70E-04 |
| <b>n</b>                                                            | 0.51     | 0.48     | 0.57     | 0.00     |
| <b>R<sub>ct</sub> (<math>\Omega \text{ cm}^2</math>)</b>            | 3.35E+03 | 4.20E+03 | 2.39E+03 | 9.97E+14 |
| <b>Chi-squared</b>                                                  | 5.36E-05 | 6.44E-05 | 1.25E-04 | 1.94E-04 |

**Table S12** Parameter values of the equivalent circuit that result from the fitting of the experimental data of the coated mild steel specimens with coating C2.

| C2                                                                  |          |          |          |          |
|---------------------------------------------------------------------|----------|----------|----------|----------|
| <b>Spraying days</b><br><b>Parameter</b>                            | 1        | 2        | 3        | 4        |
| <b>Rs (<math>\Omega \text{ cm}^2</math>)</b>                        | 29.08    | 48.56    | 42.74    | 87.17    |
| <b>Q<sub>coat</sub> (<math>\text{S cm}^{-2} \text{ s}^n</math>)</b> | 5.08E-07 | 1.60E-03 | 2.28E-03 | 1.76E-09 |
| <b>n</b>                                                            | 0.54     | 0.91     | 0.59     | 0.00     |
| <b>R<sub>coat</sub> (<math>\Omega \text{ cm}^2</math>)</b>          | 3        | 79800    | 84       | 0        |
| <b>Q<sub>dl</sub> (<math>\text{S cm}^{-2} \text{ sn}</math>)</b>    | 1.71E-03 | 7.37E-04 | 1.28E-08 | 3.90E-03 |
| <b>n</b>                                                            | 0.56     | 0.62     | 0.97     | 0.59     |
| <b>R<sub>ct</sub> (<math>\Omega \text{ cm}^2</math>)</b>            | 3.28E+03 | 5.52E+02 | 1.22E+03 | 1.03E+08 |
| <b>Chi-squared</b>                                                  | 3.80E-05 | 7.31E-05 | 5.18E-05 | 5.27E+05 |

**Table S13** Parameter values of the equivalent circuit that result from the fitting of the experimental data of the coated mild steel specimens with coating C3.

| C3                                                                  |          |          |          |          |
|---------------------------------------------------------------------|----------|----------|----------|----------|
| <b>Spraying days</b><br><b>Parameter</b>                            | 1        | 2        | 3        | 4        |
| <b>Rs (<math>\Omega \text{ cm}^2</math>)</b>                        | 1.24     | 0.37     | 0.42     | 1.88     |
| <b>Q<sub>coat</sub> (<math>\text{S cm}^{-2} \text{ s}^n</math>)</b> | 0.162    | 0.099    | 0.150    | 0.145    |
| <b>n</b>                                                            | 0.58     | 0.53     | 0.56     | 0.68     |
| <b>R<sub>coat</sub> (<math>\Omega \text{ cm}^2</math>)</b>          | 45.98    | 9.58E-07 | 4.00E-04 | 9.40     |
| <b>Q<sub>dl</sub> (<math>\text{S cm}^{-2} \text{ sn}</math>)</b>    | 4.14E-10 | 1.26E-01 | 1.36E-08 | 8.56E-04 |
| <b>n</b>                                                            | 1.00     | 0.52     | 0.09     | 0.08     |
| <b>R<sub>ct</sub> (<math>\Omega \text{ cm}^2</math>)</b>            | 2.38E-03 | 2.42E+01 | 2.10E+01 | 1.34E-03 |
| <b>Chi-squared</b>                                                  | 1.91E-05 | 5.52E-05 | 0.000105 | 4.67E-05 |



**Table S14** Parameter values of the equivalent circuit that result from the fitting of the experimental data of the coated mild steel specimens with coating C4.

| C4                                                                  |          |          |          |          |
|---------------------------------------------------------------------|----------|----------|----------|----------|
| <b>Spraying days</b><br><b>Parameter</b>                            | 1        | 2        | 3        | 4        |
| <b>Rs (<math>\Omega \text{ cm}^2</math>)</b>                        | 2.31E-15 | 1.50     | 0.06     | 3.65E-06 |
| <b>Q<sub>coat</sub> (<math>\text{S cm}^{-2} \text{ s}^n</math>)</b> | 0.125    | 0.035    | 0.066    | 0.053    |
| <b>n</b>                                                            | 0.57     | 0.00     | 0.04     | 0.15     |
| <b>R<sub>coat</sub> (<math>\Omega \text{ cm}^2</math>)</b>          | 22.27    | 3.96E-05 | 0.30     | 0.42     |
| <b>Q<sub>dl</sub> (<math>\text{S cm}^{-2} \text{ sn}</math>)</b>    | 1.40E-18 | 8.46E-02 | 2.14E-01 | 1.95E-01 |
| <b>n</b>                                                            | 0.00     | 0.59     | 0.58     | 0.61     |
| <b>R<sub>ct</sub> (<math>\Omega \text{ cm}^2</math>)</b>            | 5.21E-01 | 9.43E+01 | 2.53E+02 | 3.19E+01 |
| <b>Chi-squared</b>                                                  | 5.86E-05 | 6.61E-05 | 4.75E-05 | 2.58E-04 |

**Table S15** Parameter values of the equivalent circuit that result from the fitting of the experimental data of the coated mild steel specimens with coating C5.

| C5                                                                  |          |          |          |          |
|---------------------------------------------------------------------|----------|----------|----------|----------|
| <b>Spraying days</b><br><b>Parameter</b>                            | 1        | 2        | 3        | 4        |
| <b>Rs (<math>\Omega \text{ cm}^2</math>)</b>                        | 1.39     | 0.05     | 0.00     | 0.10     |
| <b>Q<sub>coat</sub> (<math>\text{S cm}^{-2} \text{ s}^n</math>)</b> | 0.237    | 0.098    | 0.084    | 0.218    |
| <b>n</b>                                                            | 0.55     | 0.58     | 0.59     | 0.54     |
| <b>R<sub>coat</sub> (<math>\Omega \text{ cm}^2</math>)</b>          | 4272     | 26       | 15       | 244000   |
| <b>Q<sub>dl</sub> (<math>\text{S cm}^{-2} \text{ sn}</math>)</b>    | 2.70E-06 | 9.50E-07 | 5.26E-04 | 3.84E-01 |
| <b>n</b>                                                            | 0.00     | 0.64     | 0.00     | 0.03     |
| <b>R<sub>ct</sub> (<math>\Omega \text{ cm}^2</math>)</b>            | 7.85E-06 | 1.11E+00 | 3.16E-01 | 7.90E-01 |
| <b>Chi-squared</b>                                                  | 1.51E-05 | 4.35E-05 | 1.47E-04 | 6.98E-05 |

**Table S16** Parameter values of the equivalent circuit that result from the fitting of the experimental data of the coated mild steel specimens with coating C6.

| C6                                                                  |          |          |          |          |
|---------------------------------------------------------------------|----------|----------|----------|----------|
| <b>Spraying days</b><br><b>Parameter</b>                            | 1        | 2        | 3        | 4        |
| <b>Rs (<math>\Omega \text{ cm}^2</math>)</b>                        | 23.22    | 20.30    | 29.72    | 130.70   |
| <b>Q<sub>coat</sub> (<math>\text{S cm}^{-2} \text{ s}^n</math>)</b> | 0.024    | 0.002    | 0.001    | 1.12E-09 |
| <b>n</b>                                                            | 0.76     | 0.56     | 0.55     | 0.25     |
| <b>R<sub>coat</sub> (<math>\Omega \text{ cm}^2</math>)</b>          | 960      | 108      | 527      | 9        |
| <b>Q<sub>dl</sub> (<math>\text{S cm}^{-2} \text{ sn}</math>)</b>    | 9.30E-04 | 2.80E-12 | 2.76E-03 | 2.36E-03 |
| <b>n</b>                                                            | 0.57     | 0.02     | 1.00     | 0.49     |
| <b>R<sub>ct</sub> (<math>\Omega \text{ cm}^2</math>)</b>            | 9.99E+02 | 1.16E+03 | 5.26E+02 | 7.34E+06 |
| <b>Chi-squared</b>                                                  | 4.66E-04 | 1.50E-04 | 1.06E-04 | 1.27E-03 |

**Table S17** Parameter values of the equivalent circuit that result from the fitting of the experimental data of the coated mild steel specimens with coating C7.

| C7                                                                  |          |          |          |          |
|---------------------------------------------------------------------|----------|----------|----------|----------|
| <b>Spraying days</b><br><b>Parameter</b>                            | <b>1</b> | <b>2</b> | <b>3</b> | <b>4</b> |
| <b>Rs (<math>\Omega \text{ cm}^2</math>)</b>                        | 23.03    | 32.44    | 29.18    | 40.37    |
| <b>Q<sub>coat</sub> (<math>\text{S cm}^{-2} \text{ s}^n</math>)</b> | 0.001    | 56.120   | 0.002    | 0.117    |
| <b>n</b>                                                            | 0.55     | 0.87     | 0.52     | 0.73     |
| <b>R<sub>coat</sub> (<math>\Omega \text{ cm}^2</math>)</b>          | 1377     | 1        | 1322     | 53       |
| <b>Q<sub>dl</sub> (<math>\text{S cm}^{-2} \text{ sn}</math>)</b>    | 2.29E-07 | 1.71E-03 | 6.89E-03 | 1.31E-03 |
| <b>n</b>                                                            | 0.90     | 0.53     | 1.00     | 0.54     |
| <b>R<sub>ct</sub> (<math>\Omega \text{ cm}^2</math>)</b>            | 2.43E+02 | 3.18E+03 | 1.30E+04 | 1.54E+03 |
| <b>Chi-squared</b>                                                  | 2.58E-04 | 1.02E-04 | 1.70E-04 | 2.31E-04 |

**Table S18** Parameter values of the equivalent circuit that result from the fitting of the experimental data of the coated mild steel specimens with coating C8.

| C8                                                                  |          |          |          |          |
|---------------------------------------------------------------------|----------|----------|----------|----------|
| <b>Spraying days</b><br><b>Parameter</b>                            | <b>1</b> | <b>2</b> | <b>3</b> | <b>4</b> |
| <b>Rs (<math>\Omega \text{ cm}^2</math>)</b>                        | 0.37     | 0.49     | 0.67     | 4.26     |
| <b>Q<sub>coat</sub> (<math>\text{S cm}^{-2} \text{ s}^n</math>)</b> | 0.104    | 4.43E-10 | 0.139    | 0.126    |
| <b>n</b>                                                            | 0.56     | 0.00     | 0.49     | 0.44     |
| <b>R<sub>coat</sub> (<math>\Omega \text{ cm}^2</math>)</b>          | 7.43E-05 | 2.98E-06 | 3.68E-17 | 9.49E+03 |
| <b>Q<sub>dl</sub> (<math>\text{S cm}^{-2} \text{ sn}</math>)</b>    | 2.65E-10 | 8.71E-02 | 1.00E-22 | 3.24E-16 |
| <b>n</b>                                                            | 0.00     | 0.52     | 0.20     | 0.03     |
| <b>R<sub>ct</sub> (<math>\Omega \text{ cm}^2</math>)</b>            | 266.7    | 1.64E+08 | 1.02E+08 | 6.31E-07 |
| <b>Chi-squared</b>                                                  | 1.38E-04 | 1.89E-04 | 3.97E-04 | 8.21E-05 |
